# Supplementary material for: The synergistic effect with S-vacancies and built-in electric field on a TiO2/MoS2 photoanode for enhanced photoelectrochemical performance
Source: Royal Society of Chemistry journal article supplement (doi:10.1039/d0se01515f), 2020-11-23
Supplement: d0se01515f1.pdf [file d0se01515f1.pdf]

### Supporting Information

Fig. S1 The SEM image of TiO<sub>2</sub>/MoS<sub>2</sub> without H<sub>2</sub>O<sub>2</sub> treatment

Fig. S2 Photocurrent density-voltage of TiO<sub>2</sub>/MoS<sub>2</sub> with different H<sub>2</sub>O<sub>2</sub> treatment durations

Fig. S3 Photocurrent density-time (J-t) curve of TiO<sub>2</sub>/MoS<sub>2</sub> with H<sub>2</sub>O<sub>2</sub> treatment

Fig.S4 The cut-off energy of secondary electron (left) and low binding energy region (right) in ultraviolet photoelectron spectroscopy (UPS) of (a) TiO<sub>2</sub> and (b) MoS<sub>2</sub>

Tab. S1 The work function, valence band maximum (VBM, E<sub>VBM</sub>), conduction band minimum (CBM, E<sub>CBM</sub>) and energy of band gap (E<sub>g</sub>) of TiO<sub>2</sub> and MoS<sub>2</sub>

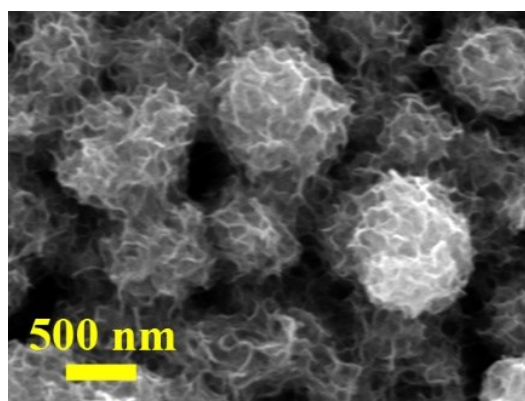

Fig. S1 The SEM image of TiO<sub>2</sub>/MoS<sub>2</sub> without H<sub>2</sub>O<sub>2</sub> treatment

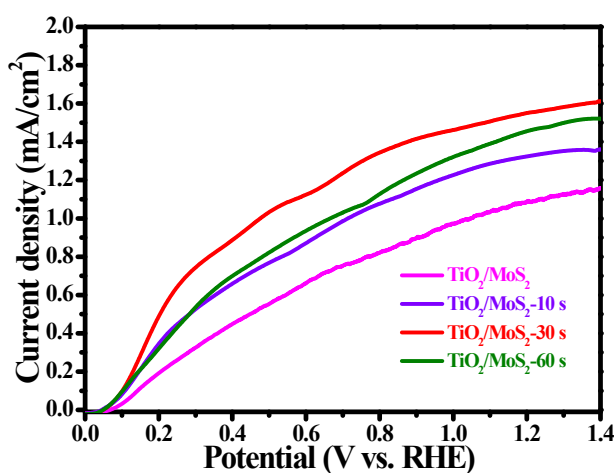

Fig. S2 Photocurrent density-voltage of TiO<sub>2</sub>/MoS<sub>2</sub> with different H<sub>2</sub>O<sub>2</sub> treatment durations

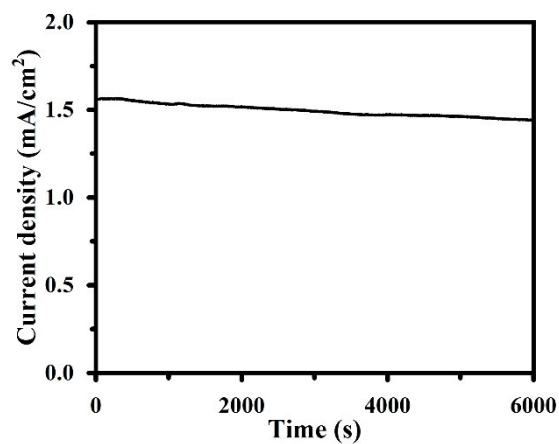

Fig. S3 Photocurrent density-time (J-t) curve of TiO<sub>2</sub>/MoS<sub>2</sub> with H<sub>2</sub>O<sub>2</sub> treatment

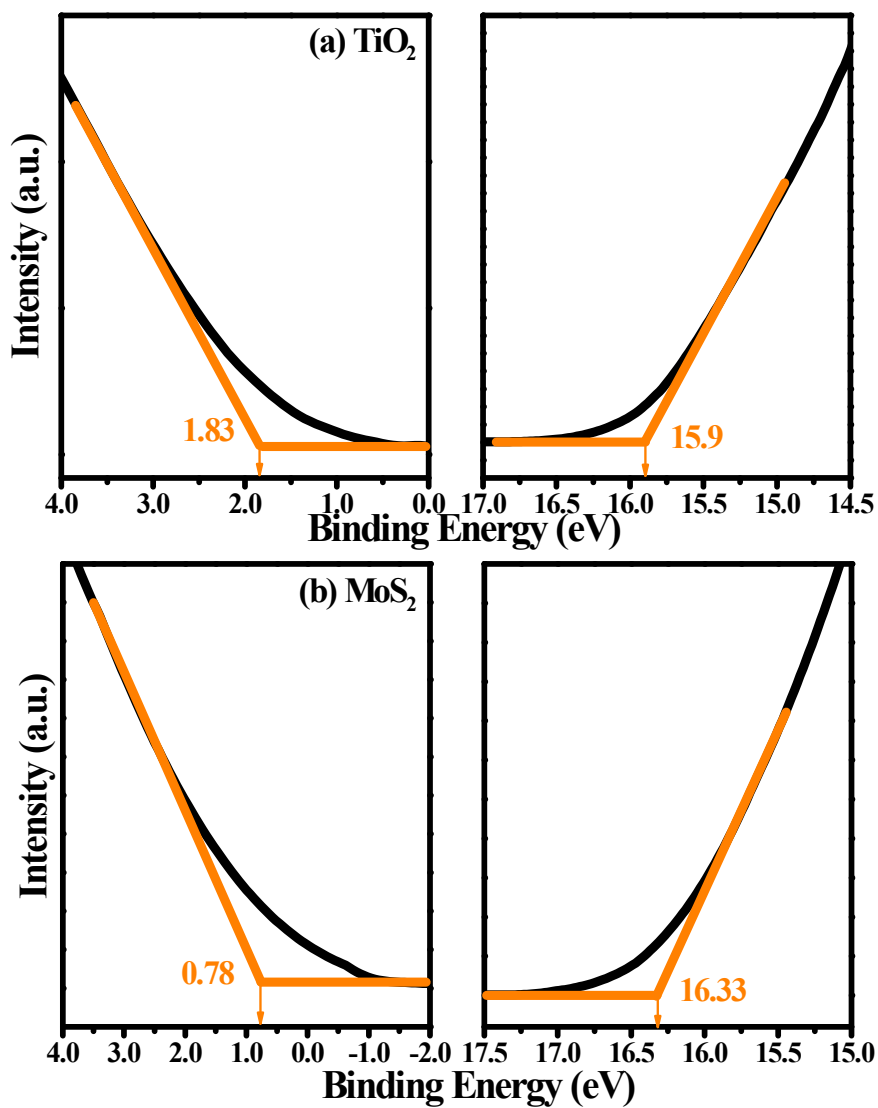

Fig. S4 The cut-off energy of secondary electron (left) and low binding energy region (right) in ultraviolet photoelectron spectroscopy (UPS) of (a) TiO<sub>2</sub> and (b) MoS<sub>2</sub>

Tab. S1 The work function, valence band maximum (VBM,  $E_{\text{VBM}}$ ), conduction band minimum (CBM,  $E_{\text{CBM}}$ ) and energy of band gap ( $E_{\text{g}}$ ) of  $\text{TiO}_2$  and  $\text{MoS}_2$

| Sample         | Work function<br>(eV) | $E_{\text{VBM}}$ (eV) | $E_{\text{CBM}}$ (eV) | $E_{\text{g}}$ (eV) |
|----------------|-----------------------|-----------------------|-----------------------|---------------------|
| $\text{TiO}_2$ | -5.32                 | -7.15                 | -4.14                 | 3.01                |
| $\text{MoS}_2$ | -4.89                 | -5.67                 | -3.92                 | 1.75                |

### The relevant equations

According to the UPS measurement, the valence band maximum (VBM) energy could be calculated by formula:

$$\text{VBM} = h\nu - (E_{\text{cutoff}} - E_{\text{onset}}) \quad (1)$$

where the photon energy  $h\nu = 21.22$  eV.
